# Supplementary material for: Steering electron flow by constructing an integrated structure in a metal–organic framework (MOF) via iminopyridine units for efficient CO2 photoreduction to C2H4 and C2H6
Source: Royal Society of Chemistry journal article supplement (doi:10.1039/d5nr00853k), 2025-01-01
Supplement: d5nr00853k1.pdf [file d5nr00853k1.pdf]

*Supporting Information for*

**Steering Electron Flow by Constructing Integrated Structure in Metal-Organic Frameworks (MOFs) via Iminopyridine Units for Efficient CO<sub>2</sub> Photoreduction to C<sub>2</sub>H<sub>4</sub> and C<sub>2</sub>H<sub>6</sub>**

Lin Ye,<sup>[b]</sup> Linghui Su,<sup>[c]</sup> Wanglai Cen,<sup>[cd]</sup> Dengrong Sun<sup>\*[ad]</sup>

<sup>[a]</sup> College of Carbon Neutrality Future Technology, Sichuan University, Chengdu 610065, China

<sup>[b]</sup> College of Chemistry, Sichuan University, Chengdu 610065, China

<sup>[c]</sup> Institute of New Energy and Low Carbon Technology, Sichuan University, Chengdu 610065, China

<sup>[d]</sup> National Engineering Research Centre for Flue Gas Desulfurization, Sichuan University, Chengdu 610065, China

E-mail: [dengrongsun@hotmail.com](mailto:dengrongsun@hotmail.com); [dengrongsun@scu.edu.cn](mailto:dengrongsun@scu.edu.cn) (D.Sun)

## Experimental Section

**Materials** 2-Aminoterephthalate ( $H_2ATA$ ) were purchased from Alfa Aesar Co.  $Ti(OC_3H_7CH_3)_4$  were purchased from Shanghai Chemical Reagent Co. Anhydrous N,N-dimethylformamide (DMF) was purchased from Sigma-Aldrich Co. 2-Pyridinecarboxaldehyde and methanol ( $CH_3OH$ ) were purchased from Aladdin.  $C_{20}H_{16}Cl_2N_4Ru \cdot 2H_2O$  was purchased from Shanghai Maclin Biochemical Technology Co. All the reagents were analytical grade and used without further purification.

**Synthesis of Ti-MOF** Ti-MOF was prepared following a previous reported procedure with a slight modification<sup>31</sup>. Typically, 2-aminoterephthalic acid ( $H_2ATA$ ) (0.5 g, 3 mmol) and tetra-n-butyl titanate  $Ti(OC_4H_9)_4$  (0.26 ml, 0.75 mmol) were added into a solution containing dimethylformamide (DMF) (9 ml) and dry MeOH (1 ml). The above mixture was stirred at room temperature for 30 min and was transferred to a 50 ml Teflon liner and heated at 150°C for 72 hours. After hydrothermal treatment, the resultant suspension was filtered, washed with DMF and methanol, respectively, and vacuum-dried to obtain the product.

**Synthesis of Ti-MOF-Py** The 2-pyridinecarboxaldehyde functionalized Ti-MOF is denoted as Ti-MOF-Py, which was prepared by following the previous report. Typically, 165.37 mg of Ti-MOF (0.1 mmol) was dispersed in toluene (10 mL) containing 58.2  $\mu L$  of 2-pyridinecarboxaldehyde. This mixture was stirred at room temperature for 2 days and then stand unperturbed for another 1 day. Subsequently, the resultant yellow powder was washed with  $3 \times 10$  mL of  $CH_2Cl_2$  and dried at 60 °C under vacuum.

**Synthesis of CuCo/Ti-MOF-Py** 82.7mg of the obtained Ti-MOF-Py was dispersed in 5 mL isopropyl alcohol containing 13.3mg of  $CuCl_2 \cdot 2H_2O$  in a 10 mL round-bottom flask. The suspension was then refluxed for 5 h under continuously stirring. The resultant was washed many large amounts of ethanol to ensure the removal of unreacted reactants and dried at 60 °C. Subsequently, 50 mg of the obtained product was dispersed in 50 mL of ethanol/ $H_2O$  (v:v=1:4) and photoreduced for 1 h. The suspension was separated by centrifugation and the solid product was washed with methanol several times and dried at 60 °C to obtain the final product.

**Synthesis of CuCo/Ti-MOF-Py-Ru** 50 mg CuCo/Ti-MOF-Py and 3 mg cis-bis (2,2' -dipyridyl) ruthenium (II) dichloride dihydrate were dissolved in 6 mL methanol and ultrasonic for

5 min, stirring at room temperature for 24 h. The resulting product is washed many times with large amounts of methanol. Then dry at 60 °C.

**Characterizations** XRD patterns were collected on a D8 Advance X-ray diffractometer (DX2700, China) with Cu K $\alpha$  radiation. The accelerating voltage and the applied current were 40 kV and 40 mA, respectively. Data were recorded at a scanning rate of 2°/min in the 2 $\theta$  range of 5–50°. FT-IR spectra of powder samples were recorded on a Nicolet iS50 FTIR spectrometer (ThermoFisher, USA). The XPS was carried out on ThermoFischer, ESCALAB Xi+ apparatus. Inductively Coupled Plasma Optical Emission Spectrometer (ICP-OES) was performed on Optima 8000 (PerkinElmer). Before ICP-OES experiment, the solid sample was digested in mixture of HNO<sub>3</sub> and milli-Q water. The TEM and energy dispersive X-ray spectroscopy (EDS) mapping images were acquired by high-resolution transmission electron microscopy (Talos F200S G2 instrument). UV–visible diffuse reflectance spectra (UV-DRS) was obtained for the dry-pressed disk samples using a Shimadzu UV-2600 (Japan) with BaSO<sub>4</sub> as a reflectance standard. Photoluminescence (PL) emission spectroscopy were performed with (Hitachi F-7100; Japan) at room temperature.

**Photocatalytic CO<sub>2</sub> reduction** The photocatalytic CO<sub>2</sub> reduction was performed by using a 300 W Xe lamp with a cut-off filter of 400 nm as a visible light source. In a typical experimental process, 20 mg of the photocatalysts was added to the reaction vessel, the system was bubbled with high-purity CO<sub>2</sub> (99.999 %) for 30 min to remove the dissolved oxygen. A pre-prepared mixture of 50ml water, acetonitrile and triethanolamine (v:v:v=1:3:1) is then injected into the reaction vessel. Xenon lamps were then used to illuminate the reaction system for six hours. The gas and liquid products were detected by gas GC and <sup>1</sup>H NMR.

**Photoelectrochemical characterization** The photoelectrochemical tests were performed in a 0.5 M Na<sub>2</sub>SO<sub>4</sub> electrolyte solution using a three-electrode system. The as-obtained films, Ag/AgCl (saturated KCl), and platinum foil (1 × 1 cm<sup>2</sup>) were used as the working electrode, reference electrode, and counter electrode, respectively, and collected on an electrochemical station (CHI760E, Shanghai Chenhua). Five milligrams of the as-prepared photocatalysts is dispersed in 400  $\mu$ L of ethanol and 600  $\mu$ L of water, and then sonicated for 5 min. Then 30  $\mu$ L of the catalyst ink was spread on the Fluorine-doped tin oxide (FTO) (1.0 × 1.0 cm<sup>2</sup>) and dried at room temperature to form working electrode.

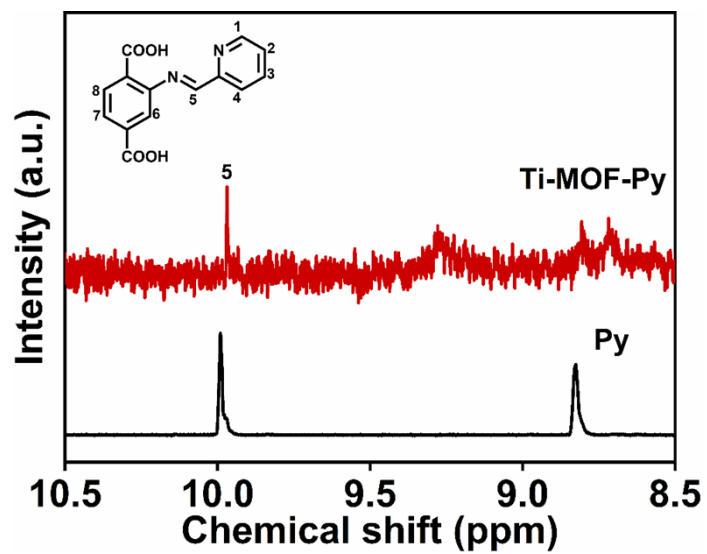

Fig. S1  $^1\text{H}$  NMR spectra of Ti-MOF-Py and Py.

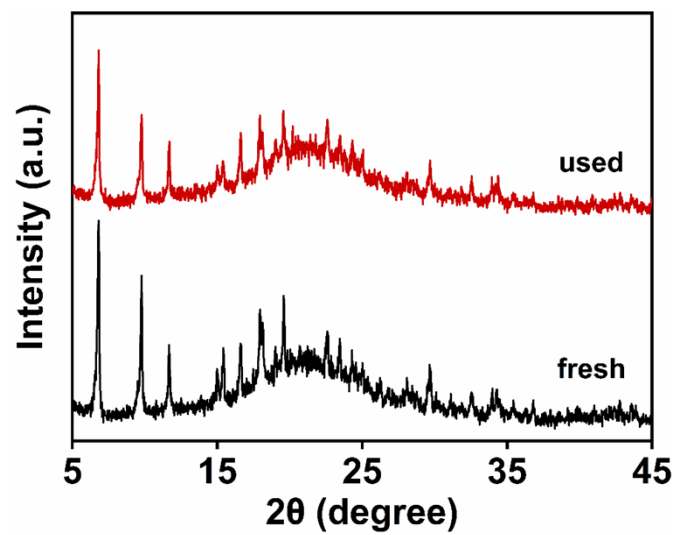

**Fig. S2** XRD patterns of CuCo-Ti-MOF-Py-Ru before and after reaction.

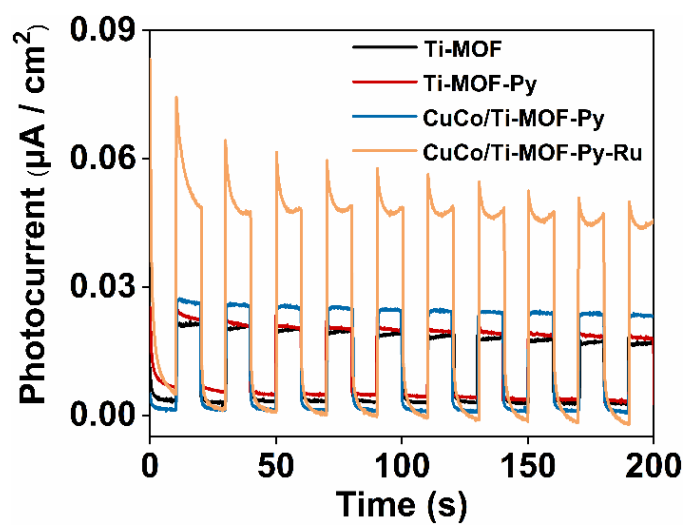

**Fig. S3** Transient photocurrent response of different samples.

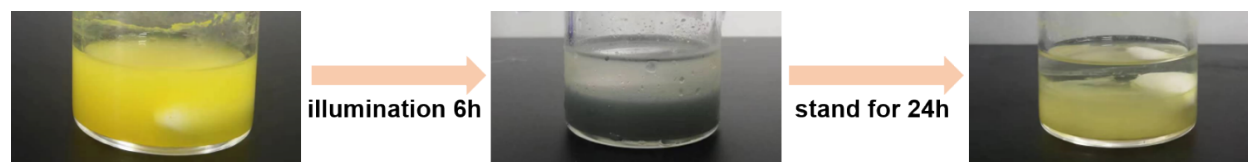

**Fig. S4** The color change of the photocatalyst during the reaction.

| Samples        | Contents of Cu (wt%) | Contents of Co (wt%) |
|----------------|----------------------|----------------------|
| Cu/Ti-MOF-Py   | 1.03 wt%             | -                    |
| CuCo/Ti-MOF-Py | 0.52 wt%             | 0.91 wt%             |

**Table S1** The contents of Cu and Co in the samples according to ICP-OES.
